# Supplementary material for: Effect of Yellowing Duration on the Chemical Profile of Yellow Tea and the Associations with Sensory Traits
Source: MDPI journal article supplement (doi:10.3390/molecules27030940), 2022-01-29
Supplement: s1 [file s1]

Table S1 Sensory-traits values of yellow teas with different yellowing time

| Sensory traits  | Y1                | Y2                | Y3                | Y4                | Y5                   | Y6                | Y7                |
|-----------------|-------------------|-------------------|-------------------|-------------------|----------------------|-------------------|-------------------|
| Sweet flavor    | $0.50 \pm 0.55^e$ | $2.50 \pm 0.55^d$ | $5.50 \pm 0.55^c$ | $7.08 \pm 0.49^b$ | $8.17 \pm 0.41^a$    | $9.00 \pm 0.00^a$ | $7.00 \pm 0.32^b$ |
| Over-oxidation  | $0.00 \pm 0.00^c$    | $2.50 \pm 0.55^b$ | $4.58 \pm 0.66^a$ |
| Green-tea aroma | $8.83 \pm 0.41^a$ | $6.33 \pm 0.52^b$ | $3.83 \pm 0.75^c$ | $1.50 \pm 0.55^d$ | $0.17 \pm 0.41^e$    | $0.00 \pm 0.00^e$ | $0.00 \pm 0.00^e$ |
| Umami           | $8.67 \pm 0.52^a$ | $6.33 \pm 0.52^b$ | $4.50 \pm 0.55^c$ | $2.67 \pm 0.52^d$ | $1.50 \pm 0.55^d$    | $0.17 \pm 0.41^e$ | $0.00 \pm 0.00^e$ |
| Softness        | $0.50 \pm 0.55^e$ | $1.83 \pm 0.41^d$ | $3.67 \pm 0.52^c$ | $5.50 \pm 0.55^b$ | $6.83 \pm 0.75^b$    | $8.17 \pm 0.75^a$ | $8.67 \pm 0.52^a$ |
| Sweetness       | $0.33 \pm 0.52^d$ | $1.50 \pm 0.55^d$ | $3.50 \pm 0.55^c$ | $5.67 \pm 0.52^b$ | $7.00 \pm 0.63^{ab}$ | $8.00 \pm 0.63^a$ | $6.17 \pm 0.75^b$ |

Data with different alphabetic letters in a same row were significantly different at  $p = 0.05$ .
